# Supplementary material for: Chemometrics in forensic science: approaches and applications
Source: Royal Society of Chemistry journal article supplement (doi:10.1039/d1an00082a), 2021-01-01
Supplement: d1an00082a1.pdf [file d1an00082a1.pdf]

Chemometrics in Forensic Science: Approaches and Applications

Georgina Sauzier, Wilhelm van Bronswijk and Simon W. Lewis

Table S1: Comparison of common commercial and open source software packages for chemometric data analysis.

| Software and OS Compatibility                                       | Licensing Options                                                                    | Range of Functionalities                                                                                                                                                                                                                                                                                                                                                         | Indicative Pricing<br>(1 Year Single-User License)<br>Estimates given in \$USD |
|---------------------------------------------------------------------|--------------------------------------------------------------------------------------|----------------------------------------------------------------------------------------------------------------------------------------------------------------------------------------------------------------------------------------------------------------------------------------------------------------------------------------------------------------------------------|--------------------------------------------------------------------------------|
| MATLAB (Mathworks, USA)<br>For Windows, macOS, Linux                | Annual or perpetual                                                                  | Most chemometric functionalities require a separate Toolbox add-on. The Statistics and Machine Learning Toolbox (Mathworks) offers a broad range of pattern recognition, regression and experimental design methods. The Deep Learning Toolbox (Mathworks) or PLS Toolbox (Eigenvector Research) enable expanded pattern recognition, regression and data pre-processing options | MATLAB: \$815<br>Mathworks Toolboxes: \$405 - \$470<br>PLS Toolbox: \$2095     |
| The Unscrambler X<br>(Camo Analytics, Norway)<br>For Windows only   | Single- and multi-user plans<br>(minimum 6 months), term or<br>perpetual licensing.  | Base software offers a broad range of data pre-processing, pattern recognition and regression methods. Versions 10.4 onwards are bundled with Design-Expert (Stat-Ease, USA), enabling experimental design                                                                                                                                                                       | \$1,000                                                                        |
| The Unscrambler HSI<br>(Camo Analytics, Norway)<br>For Windows only | Single-user annual license                                                           | Basic pattern recognition, regression and experimental design methods for hyperspectral image analysis                                                                                                                                                                                                                                                                           | \$1,200                                                                        |
| R (R Core Team)<br>For Windows, macOS, Linux                        | Open source                                                                          | Effectively unlimited; new functionalities can be coded and shared                                                                                                                                                                                                                                                                                                               | Open source                                                                    |
| IBM SPSS Statistics<br>(IBM Corporation, USA)<br>For Windows, macOS | Single- and multi-user plans<br>(monthly or annual), term or<br>perpetual licensing. | Basic pattern recognition and regression                                                                                                                                                                                                                                                                                                                                         | \$1,020                                                                        |
| Minitab (Minitab LLC, USA)<br>For Windows, macOS                    | Single- and multi-user plans<br>(minimum 6 months) or<br>perpetual licensing.        | Basic pattern recognition and regression, as well as a broad range of experimental design options                                                                                                                                                                                                                                                                                | \$1,230                                                                        |
| XLStat (Addinsoft, Paris)<br>For Windows, macOS                     | Single- and multi-user plans<br>(minimum 12 months).                                 | Basic version offers basic pattern recognition and regression analysis. XLSTAT Basic Plus enables expanded pattern recognition and regression, while XLSTAT Premium enables experimental design                                                                                                                                                                                  | XLSTAT Basic: \$295<br>XLSTAT Basic Plus: \$495<br>XLSTAT Premium: \$1495      |
| SIMCA<br>(MKS/Umetrics, Sweden)<br>For Windows only                 | Single-user license with annual<br>maintenance support fee.                          | Basic pattern recognition, regression and design of experiment methods scriptable using Python                                                                                                                                                                                                                                                                                   | \$1,720                                                                        |
